# Supplementary material for: The Role of NMDA Receptor Partial Antagonist, Carbamathione, as a Therapeutic Agent for Transient Global Ischemia
Source: MDPI journal article supplement (doi:10.3390/biomedicines11071885), 2023-07-03
Supplement: s1 [file s1]

**Supplementary Table S1: List of reagents used for cell culture**

| <b>Reagents*</b>                                       | <b>Company and Catalogue Number</b>                    |
|--------------------------------------------------------|--------------------------------------------------------|
| F-12 K media                                           | ATCC Cat# ATCC <sup>(R)</sup> 30-2004 <sup>TM</sup>    |
| Trypsin-EDTA solution                                  | ATCC Cat# ATCC <sup>(R)</sup> 30-2101 <sup>TM</sup>    |
| Horse serum                                            | ATCC Cat# ATCC <sup>(R)</sup> 30-2040 <sup>TM</sup>    |
| Fetal bovine serum                                     | ATCC Cat# ATCC <sup>(R)</sup> 30-2020 <sup>TM</sup>    |
| Rat pheochromocytoma (PC)<br>PC-12 cell line           | ATCC Cat# ATCC <sup>(R)</sup> CRL-1721.1 <sup>TM</sup> |
|                                                        |                                                        |
| Poly-D-Lysine                                          | Sigma Cat# P6407-5MG                                   |
| Glutamate (L-Glutamic acid<br>monosodium salt hydrate) | Sigma Cat# G5889-100G                                  |
| Mammalian Protease inhibitor<br>cocktail               | Sigma Cat# P8430-5ML                                   |
|                                                        |                                                        |
| ATP Bioluminescent Assay kit                           | Promega Cat# G7573                                     |
|                                                        |                                                        |
| RIPA Lysis and Extraction Buffer                       | G-Biosciences Cat# 786-490                             |
|                                                        |                                                        |
| Halt <sup>TM</sup> Phosphatase inhibitor               | Thermo Scientific Cat# 1861277                         |
|                                                        |                                                        |
| Bio-red Protein Assay Dye Reagent<br>Concentrate       | Biored Cat# 5000006                                    |
|                                                        |                                                        |
| 96 Well plate                                          | VWR Cat# 10861-666                                     |
| 6 Well plate                                           | VWR Cat# 10062-892                                     |

\*All the reagents purchased in year 2018-2019 (between 01/15/2018 to 12/15/2019).

**Supplementary Table S2: List of antibodies used for western blotting**

| <b>Antibody*</b>                    | <b>Company and Catalogue Number</b>                                                            |
|-------------------------------------|------------------------------------------------------------------------------------------------|
| Anti-GRP78 antibody                 | Abcam (Waltham, MA 02453, USA), Cat# ab21685                                                   |
| Anti-Hsp 70antibody                 | Abcam (Waltham, MA 02453, USA), Cat# ab31010                                                   |
| Anti-Hsp 27 antibody                | Abcam (Waltham, MA 02453, USA), Cat# ab12351                                                   |
| Anti-Caspase-12 antibody            | Abcam (Waltham, MA 02453, USA), Cat# ab62484                                                   |
| Anti-IRE1 antibody                  | Abcam (Waltham, MA 02453, USA), Cat# ab37073                                                   |
| Anti-ATF4 antibody                  | Abcam (Waltham, MA 02453, USA), Cat# ab85049                                                   |
| Anti-XBP1 Antibody                  | Abcam (Waltham, MA 02453, USA), Cat# ab37152                                                   |
|                                     |                                                                                                |
| Anti-GAPDH antibody                 | Cell Signaling Technologies (Danvers, MA 01923, USA.), Cat# 5174S                              |
| Anti-Akt antibody                   | Cell Signaling Technologies (Danvers, MA 01923, USA.), Cat# 4691S                              |
| Anti-Phospho Akt (P-Akt) antibody   | Cell Signaling Technologies (Danvers, MA 01923, USA.), Cat# 4060S                              |
| Anti-Bax antibody                   | Cell Signaling Technologies (Danvers, MA 01923, USA.), Cat# 2772S                              |
| Anti-Becclin-1 antibody             | Cell Signaling Technologies (Danvers, MA 01923, USA.), Cat# 3738S                              |
| Anti-eIF2 $\alpha$ antibody         | Cell Signaling Technologies (Danvers, MA 01923, USA.), Cat# 2103S                              |
| Anti-P-eIF2 $\alpha$ antibody       | Cell Signaling Technologies (Danvers, MA 01923, USA.), Cat# 9721S                              |
| Anti-P-STAT 3 antibody              | Cell Signaling Technologies (Danvers, MA 01923, USA.), Cat# 9145S                              |
| Anti-Cleaved Caspase- 3 antibody    | Cell Signaling Technologies (Danvers, MA 01923, USA.), Cat# 9664S                              |
|                                     |                                                                                                |
| Anti-CHOP/GADD153 antibody          | SantaCruz Biotechnology (Dallas, Texas 75220 U.S.A.), Cat# sc-793                              |
| Anti-Bcl-2 (N-19) antibody          | SantaCruz Biotechnology (Dallas, Texas 75220 U.S.A.), Cat# sc-492                              |
|                                     |                                                                                                |
| Anti-ATF6 antibody                  | Novus Biologicals;; Centennial, CO 80112, USA (another name:Imgenex), Cat# IMG-273/ NBP1-40256 |
|                                     |                                                                                                |
| Secondary goat anti-mouse antibody  | LI-COR Bioscience (Lincoln, Nebraska USA 68504-0425), cat#925-32210                            |
| Secondary goat anti-rabbit antibody | LI-COR Bioscience (Lincoln, Nebraska USA 68504-0425), cat#925-32211                            |

\*All the antibodies purchased in year 2018-2019 (between 01/15/2018 to 12/15/2019).
